# Supplementary material for: Ultra-selective detection of sub-ppm-level benzene using Pd–SnO2 yolk–shell micro-reactors with a catalytic Co3O4 overlayer for monitoring air quality
Source: Royal Society of Chemistry journal article supplement (doi:10.1039/c6ta09397c), 2016-11-23
Supplement: c6ta09397c1.pdf [file c6ta09397c1.pdf]

Supplementary Information

**Ultrasensitive detection of sub-ppm-level benzene using Pd-SnO<sub>2</sub> yolk-shell micro-reactors with catalytic Co<sub>3</sub>O<sub>4</sub> overlayer for monitoring air quality**

Seong-Yong Jeong,<sup>a</sup> Ji-Wook Yoon,<sup>a</sup> Tae-Hyung Kim,<sup>a</sup> Hyun-Mook Jeong,<sup>a</sup>

Chul-Soon Lee,<sup>a</sup> Yun Chan Kang<sup>a</sup> and Jong-Heun Lee<sup>a,\*</sup>

<sup>a</sup> Department of Materials Science and Engineering, Korea University, Seoul 02841, Republic of Korea.

E-mail: \*Jong-Heun Lee, [jongheun@korea.ac.kr](mailto:jongheun@korea.ac.kr)

**SUPPLEMENTARY FIGURES**

**Figure S1**

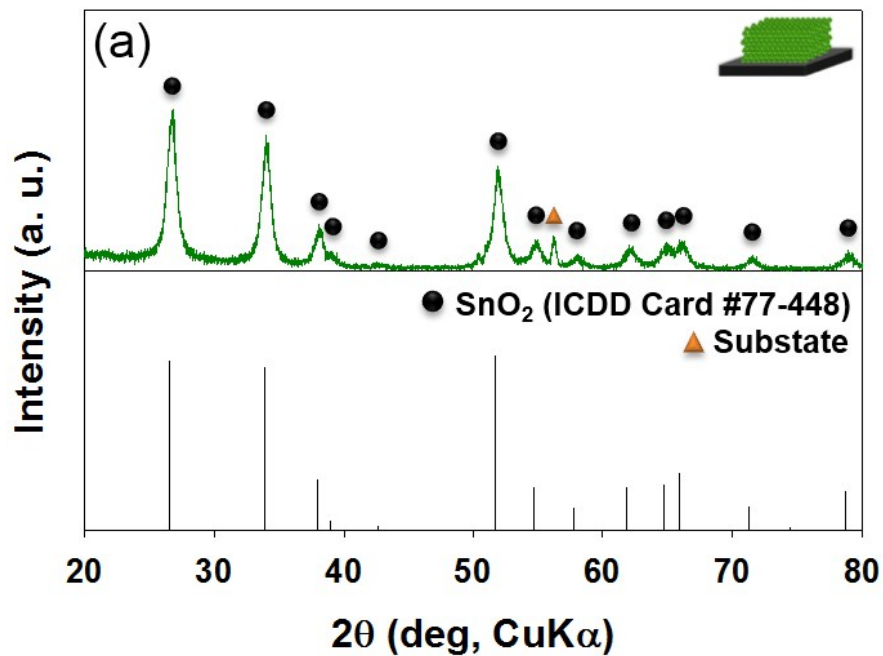

**Figure S1** XRD pattern of the Pd-SnO<sub>2</sub> film.

Figure S2

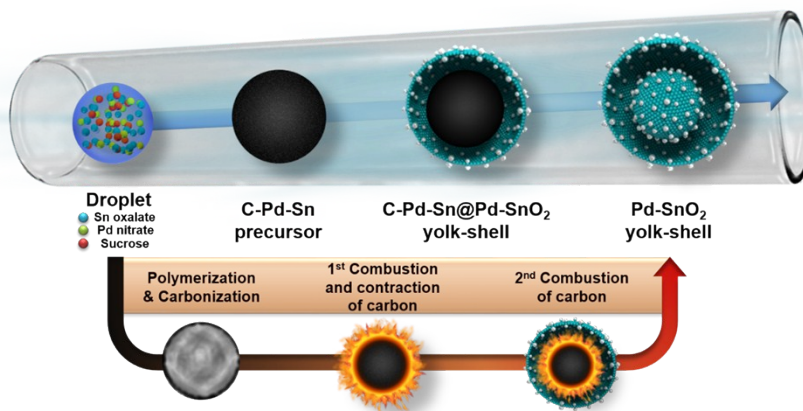

Figure S2 The formation mechanism of the Pd-SnO<sub>2</sub> yolk-shell spheres.

**Figure S3**

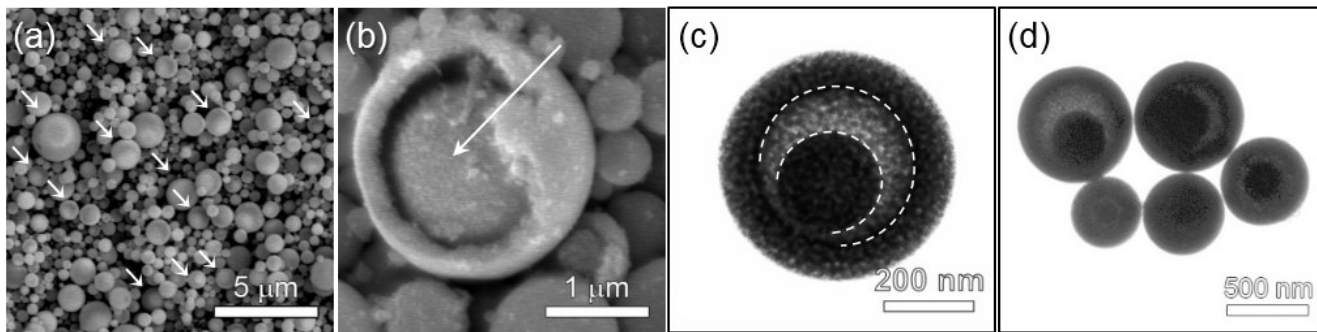

**Figure S3** (a,b) SEM and (c,d) TEM images of Pd-SnO<sub>2</sub> yolk-shell spheres.

Figure S4

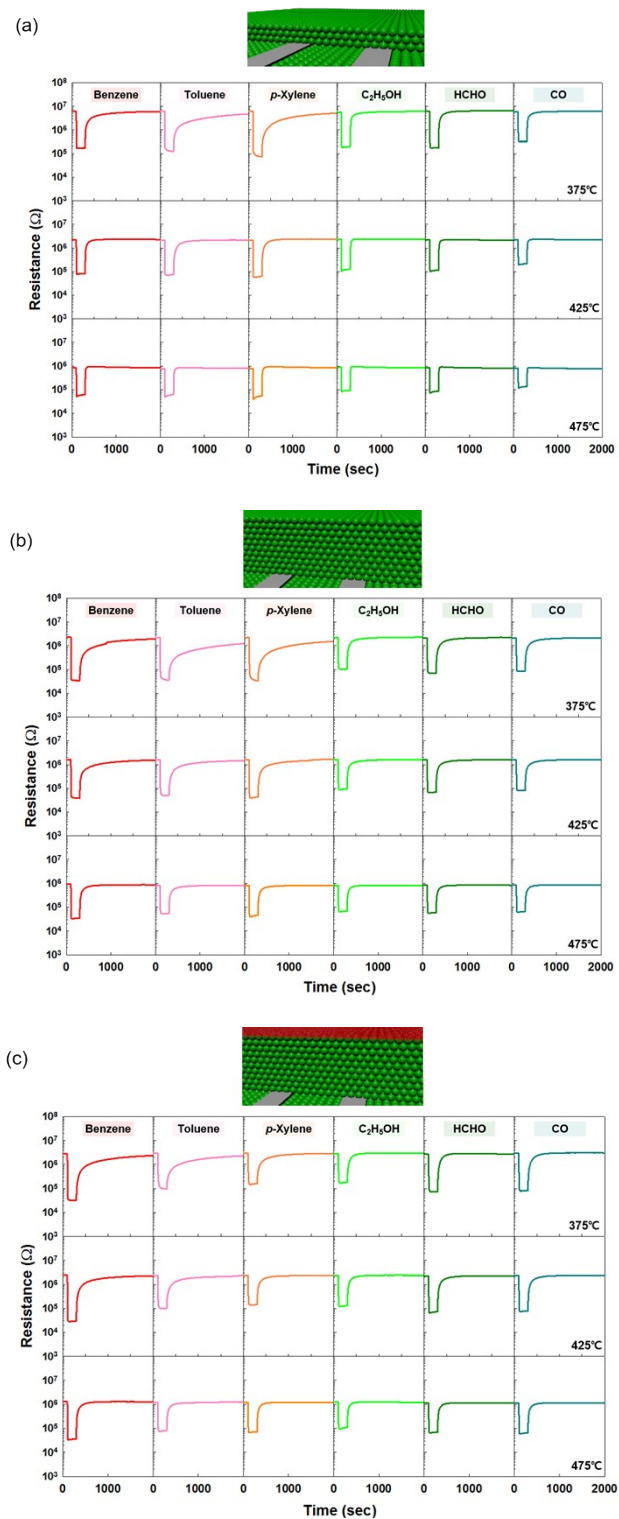

**Figure S4** Gas -sensing transients of the (a) Pd-SnO<sub>2</sub>(1) sensor, (b) Pd-SnO<sub>2</sub>(3) sensor, and (c) Co<sub>3</sub>O<sub>4</sub>(20)/Pd-SnO<sub>2</sub>(3) sensor (Concentration of the analyte gas: 5 ppm).

Figure S5

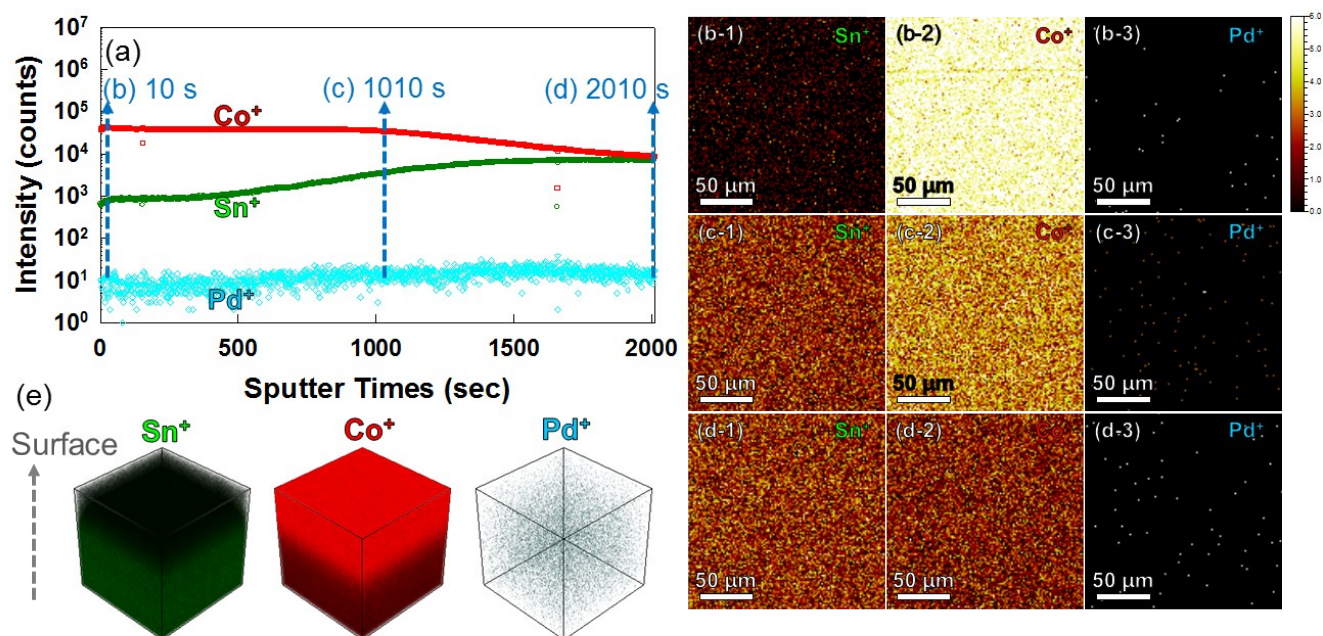

**Figure S5** (a) TOF-SIMS depth profile of the  $\text{Co}_3\text{O}_4(20)/\text{Pd-SnO}_2(3)$  sensing film and Sn, Co, Pd elemental mapping at sputter times of (b) 10 s, (c) 1010 s, and (d) 2010 s; (e) three-dimensional composition image with sputter time.

Figure S6

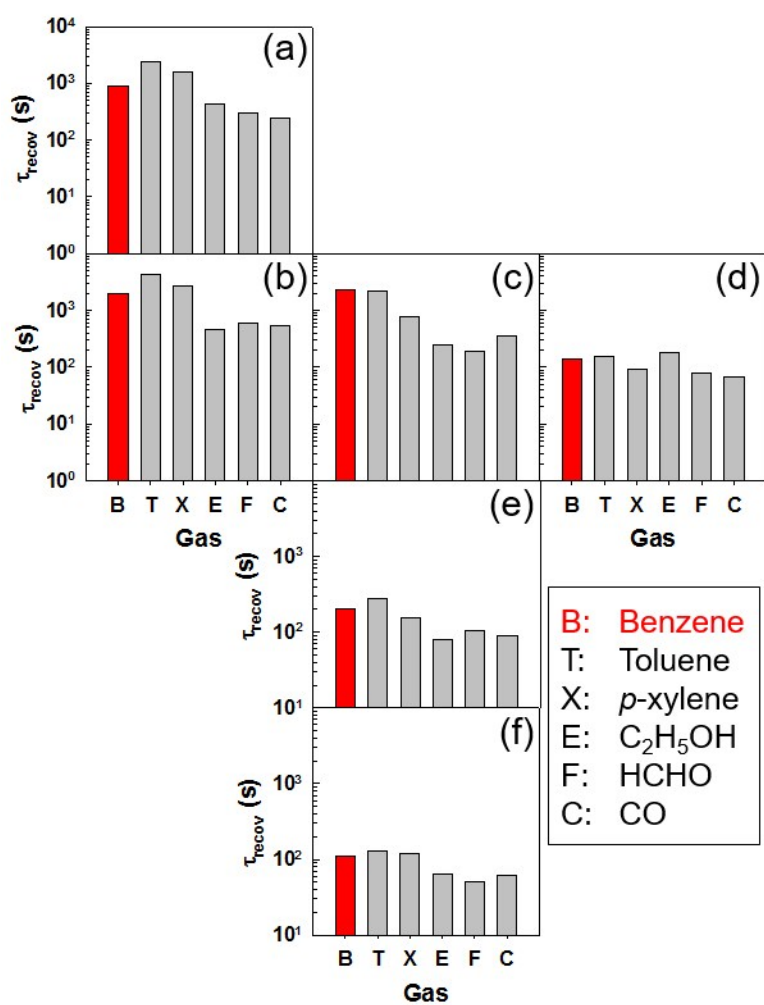

**Figure S6** 90% recovery time of the (a) Pd-SnO<sub>2</sub>(1) sensor, (b) Pd-SnO<sub>2</sub>(3) sensor, (c) Co<sub>3</sub>O<sub>4</sub>(20)/Pd-SnO<sub>2</sub>(3) sensor, (d) Co<sub>3</sub>O<sub>4</sub>(80)/Pd-SnO<sub>2</sub>(3) sensor, (e) Co<sub>3</sub>O<sub>4</sub>(20)/Pd-SnO<sub>2</sub>(5) sensor, and (f) Co<sub>3</sub>O<sub>4</sub>(20)/Pd-SnO<sub>2</sub>(8) sensor upon exposure to air after sensing of 5 ppm benzene (B), toluene (T), *p*-xylene (X),  $\text{C}_2\text{H}_5\text{OH}$  (E), HCHO (F), and CO (C) at 375 °C

Figure S7

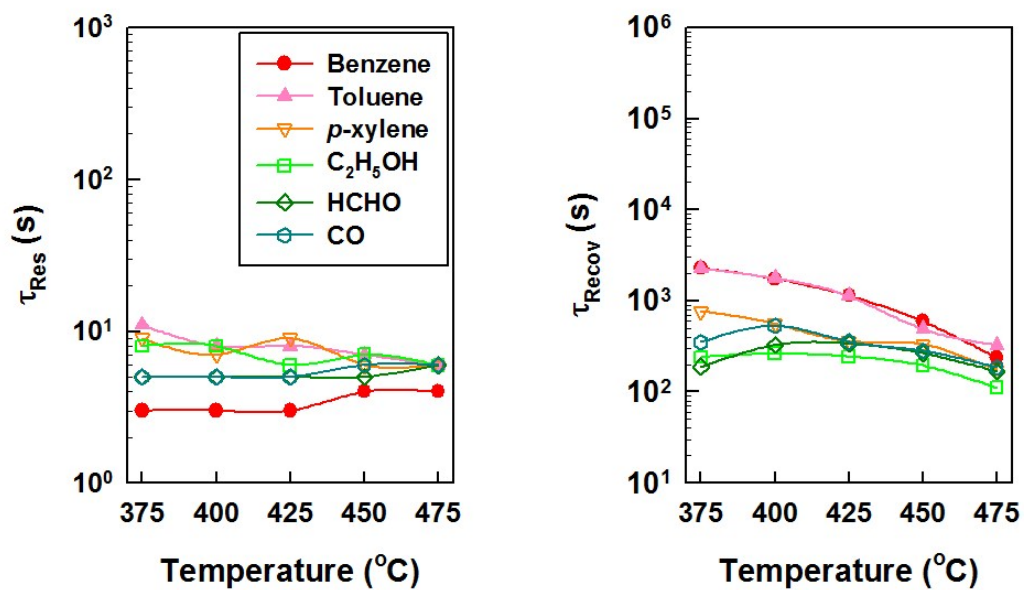

**Figure S7** (a) 90% response time ( $\tau_{\text{res}}$ ) and (b) 90% recovery time ( $\tau_{\text{recov}}$ ) of the  $\text{Co}_3\text{O}_4(20)/\text{Pd-SnO}_2(3)$  sensor at temperatures in the range of 375–475  $^{\circ}\text{C}$ .
